# Supplementary material for: Multiplikatorenkonzepte zu Stress- und Emotionsregulation im Rettungsdienst – ein Scoping-Review
Source: Springer Nature journal article supplement (doi:10.1007/s10049-024-01318-1), 2024-03-22
Supplement: MOESM1 [file 26905242]

**Zusatzmaterial zum Beitrag** „Multiplikatorenkonzepte zu Stress- und Emotionsregulation im Rettungsdienst – ein Scoping Review“ von Hummel M., Steudtner M., Gebauer E. und Buruck G. (2024) in *Notfall+Rettungsmedizin*.

Beitrag und Zusatzmaterial stehen Ihnen auf [www.springermedizin.de](http://www.springermedizin.de) zur Verfügung. Bitte geben Sie dort den Beitragstitel in die Suche ein.

## Methodik

Scoping Reviews dienen dem Ziel der systematischen Wissenssynthese, um die Evidenz zu einem Thema zu erfassen, die wichtigsten Konzepte, Theorien und Quellen sowie um Forschungslücken zu identifizieren [1]. Das Ziel ist ein Überblick vorhandener Evidenz unabhängig der Qualität [2]. Die vom Joanna Briggs Institute (JBI) [3] entwickelte Methodik sowie die „Preferred Reporting Items for Systematic Reviews and Meta-Analyses extension for scoping reviews“ (PRISMA-ScR-Checklist) [1] stellen den methodischen Orientierungsrahmen für die Übersicht dar. Ergänzend werden die methodische Anleitung [2] sowie der Leitfaden der Bundesanstalt für Arbeitsschutz und Arbeitsmedizin herangezogen [4]. Die Dokumentation erfolgt anhand des Rechercheprotokolls für systematische Literaturrecherchen [5].

### **Kontext und Studienpopulation**

In der Übersicht werden betriebsgrößen- und trägerübergreifend alle erwerbstätig Beschäftigten des Rettungsdienstes im Alter von 18-67 Jahren eingeschlossen [6]. Ausgeschlossen sind Studien, die sich explizit an Studierende und Freiwillige richten. Es gibt keine geografischen, geschlechterspezifischen, ethnischen oder weiteren Einschränkungen des Settings.

### **Konzepte**

Das Konzept der Stressregulation orientiert sich am Modell der Salutogenese [7]. Die Operationalisierung erfolgt beispielsweise mit der Posttraumatic Stress Disorder Checklist for DSM-5 (PCL-5) PTSD [8] oder der Depression Anxiety Stress Scale-21 (DASS-21) [9].

Das Konstrukt der Emotionsregulation wird als ein Prozess des Beobachtens, Bewertens und Veränderns von emotionalen Reaktionen, ihrer Intensität und ihrer Dauer charakterisiert, mit dem Ziel, das eigene Wohlbefinden zu steigern [10, 11]. Operationalisiert wird dieses

Konstrukt durch valide Fragebögen, wie z. B. dem SEK-27 (Selbsteinschätzung emotionaler Kompetenzen) [12] oder dem Emotion Regulation Questionnaire (ERQ) [8, 13].

Das Konstrukt der Multiplikatorenkonzepte orientiert sich an den vier Stufen der Kriterien für gute Praxis zur sozialogenbezogenen Gesundheitsförderung [14]. Stufe 1 wird als Vorstufe definiert, in der Multiplikatorenpersonen gewonnen werden. Im nächsten Schritt werden diese anhand eines Schulungskonzeptes fortgebildet. Daran knüpft Phase 3 an, die eine kontinuierliche Betreuung und Fortbildung beinhaltet. In der vierten und letzten Stufe wird die Arbeit der Multiplikatorenpersonen unter Einbezug der Beschäftigten systematisch evaluiert. Mit jeder Stufe steigen die Einbindung, Qualifizierung und Begleitung der Trainer.

### **Studientypen und Evidenzquellen**

Eingeschlossen werden deutsch- und englischsprachige Studientypen, welche die Gewinnung, Schulung, systematische Fortbildung von Multiplikatorenkonzepten und/oder die Adaption bzw. Evaluierung der Konzepte beinhalten [4]. wird keine Einschränkung hinsichtlich der Evidenzquelle oder deren Qualität vorgenommen, um einen möglichst großen Überblick über die Forschungslandschaft und die Datenbasis zu erhalten.

### **Suchstrategie**

Um die Suchstrategie so umfassend wie möglich zu gestalten, werden veröffentlichte und unveröffentlichte Primärquellen, Übersichtsarbeiten sowie graue Literatur genutzt. Die Recherchestrategie umfasst drei Arbeitsschritte [2]. In einem ersten Schritt erfolgt eine grobe und eingeschränkte initiale Recherche in den Datenbanken MEDLINE (PubMed) und PSYINDEX (PubPsych). Passende Publikationstitel und Abstracts werden identifiziert und gelesen. Die im Text verwendeten Schlagwörter und Indexbegriffe zur Beschreibung des Artikels werden analysiert und bei thematischer Passung aufgenommen. Im zweiten Arbeitsschritt erfolgt eine Erweiterung der Datenbanken auf PSYINDEX, PASCAL, ISOC-Psicología, MEDLINE, ERIC, NARCIS, NORART, PsychOpen und PsychData via PubPsych sowie MEDLINE und PubMed Central via PubMed. Die vollständige Suchstrategie am Beispiel der Suchoberfläche PubMed ist im Anhang abgebildet. Diese wurde am 15.12.2022 ausgeführt und am 23.08.2023 aktualisiert. Der dritte und letzte Arbeitsschritt der Suchstrategie beinhaltet die Sichtung der Referenzlisten der zur Überprüfung eingeschlossenen Publikationen. Bei Bedarf werden die Autoren der Primärquellen für

weitere Informationen hinsichtlich ihrer Studienergebnisse kontaktiert. Die Handsuche nach unveröffentlichten Daten sowie grauer Literatur konzentriert sich außerdem auf die Praxisdatenbank des Kooperationsverbundes Gesundheitliche Chancengleichheit [14]. Berücksichtigt werden alle Publikationen ab 1997, da in diesem Jahr die Luxemburger Deklaration der Europäische Union für betriebliche Gesundheitsförderung verabschiedet wurde [15].

### **Studienauswahl und Datenextraktion**

Alle Literaturquellen, die auf der Grundlage der Einschlusskriterien ausgewählt werden, werden in einer Literaturverwaltungssoftware (Citavi) strukturiert zusammengestellt. Bestehende Dubletten werden kontrolliert und entfernt. Im Anschluss werden die Literaturquellen von zwei Reviewern unabhängig voneinander zunächst nach Titel und Anstract gesichtet. Hierzu wird ein Pretest vorgeschaltet. Im Anschluss wird das Volltext-Screening durchgeführt. Die Dokumentation erfolgt in einer Tabelle. Bei potenziell relevanten Publikationen wird der Volltext der Literaturquelle aufgerufen und mit Blick auf die definierten Einschlusskriterien im Detail gelesen und bewertet. Diejenigen Literaturquellen, die die Einschlusskriterien nicht erfüllen, werden nicht weiter berücksichtigt. In diesem Zusammenhang wird eine narrative Beschreibung des Auswahlprozesses in der Übersicht vorgenommen und die Entscheidungsfindung für oder gegen eine Quelle mittels Flussdiagramms angelegt. Die Ergebnisse werden anhand des Preferred Reporting Items for Systematic Reviews and Reviews und Meta-Analysen (PRISMA-ScR) [1] vorgestellt. Auftretende Unstimmigkeiten im Quellenauswahlprozess werden durch Diskussion und/oder durch Heranziehung eines dritten Reviewers aufgelöst.

Die Extraktion der Daten aus den Literaturquellen erfolgt mit Hilfe eines modifizierten Extraktionsformulars [2]. Das Formular enthält eine Tabelle, die die Hauptkategorien Scoping Review Details, Einschluss-/Ausschlusskriterien, Beschreibung der Studiendetails und der einzelnen Konzepte umfasst. Während der Datenextraktion können die Tabelle und die Hauptkategorien bei Bedarf angepasst und aktualisiert werden. Die Ergebnisse werden in der Tabelle stichwortartig festgehalten. Anschließend erfolgt eine kurze beschreibende Zusammenfassung der jeweiligen Einzelergebnisse. Der Datenextraktion wird ein Pretest vorgeschaltet, um sicherzustellen, dass alle wichtigen Ergebnisse extrahiert werden. Die Datenextraktion wird von jeweils zwei Reviewern unabhängig voneinander vorgenommen. Im Anschluss werden die Ergebnisse hinsichtlich der identifizierten Multiplikatorenkonzepte

zur Stress- und Emotionsregulation und deren Auswirkung auf die psychische Gesundheit im Arbeitskontext diskutiert.

## Literatur

1. Tricco AC, Lillie E, Zarin W et al. (2018) PRISMA Extension for Scoping Reviews (PRISMA-ScR): Checklist and Explanation. 1539-3704 169(7): 467–473. doi: 10.7326/M18-0850
2. Elm E von, Schreiber G, Haupt CC (2019) Methodische Anleitung für Scoping Reviews (JBI-Methodologie) (Not Available). Zeitschrift für Evidenz, Fortbildung und Qualität im Gesundheitswesen 143: 1–7. doi: 10.1016/j.zefq.2019.05.004
3. Peters MDJ, Godfrey C., McInerney P et al. Chapter 11: Scoping Reviews (2020 version). In: Aromataris E, Munn Z. (Editors) (eds) JBI Manual for Evidence Synthesis, JBI, 2020
4. Bundesanstalt für Arbeitsschutz und Arbeitsmedizin (2014) Leitfaden für die Erarbeitung von Scoping Reviews. Projektteam „Psychische Gesundheit in der Arbeitswelt“. [https://www.baua.de/DE/Forschung/Projekt-Psychische-Gesundheit-in-der-Arbeitswelt/pdf/Leitfaden-Scoping-Reviews.pdf?\\_\\_blob=publicationFile&v=2](https://www.baua.de/DE/Forschung/Projekt-Psychische-Gesundheit-in-der-Arbeitswelt/pdf/Leitfaden-Scoping-Reviews.pdf?__blob=publicationFile&v=2). Accessed 15 Aug 2023
5. Hirt J, Nordhausen T (2022) Rechercheprotokoll für eine systematische Literaturrecherche. In: Nordhausen, T.; Hirt, J. RefHunter. Systematische Literaturrecherche. [https://refhunter.org/research\\_support/rechercheprotokoll/](https://refhunter.org/research_support/rechercheprotokoll/). Accessed 16 Aug 2023
6. Johnston S, Sanderson K, Bowes L et al. (2022) Why do ambulance employees (not) seek organisational help for mental health support? A mixed-methods systematic review protocol of organisational support available and barriers/facilitators to uptake. BMJ open 12(10): e062775. doi: 10.1136/bmjopen-2022-062775
7. Antonovsky A (1979) Health, stress, and coping. The Jossey-Bass social and behavioral science series. Jossey-Bass Publishers, San Francisco, Washington, London
8. Abler B, Kessler H (2011) ERQ - Emotion Regulation Questionnaire - deutsche Fassung. ZPID (Leibniz Institute for Psychology Information) – Testarchiv
9. Lovibond SH, Lovibond PF (1995) PsycTESTS Dataset
10. Aldao A, Nolen-Hoeksema S, Schweizer S (2010) Emotion-regulation strategies across psychopathology: A meta-analytic review. Clinical psychology review 30(2): 217–237. doi: 10.1016/j.cpr.2009.11.004
11. Thompson RA (1994) Emotion Regulation: A Theme in Search of Definition. Monographs of the Society for Research in Child Development 59(2/3): 25. doi: 10.2307/1166137
12. Berking M, Znoj H (2011) SEK-27 - Fragebogen zur standardisierten Selbsteinschätzung emotionaler Kompetenzen. ZPID (Leibniz Institute for Psychology Information) – Testarchiv
13. Gross JJ (2002) Emotion regulation: affective, cognitive, and social consequences. Psychophysiology (New York, Print) 39(3): 281–291. doi: 10.1017/s0048577201393198
14. Kooperationsverbund Gesundheitliche Chancengleichheit (2021) Kriterien für gute Praxis der soziallyagenbezogenen Gesundheitsförderung, Kriterium „Belege für Wirksamkeit und Kosten“

15. European Network For Workplace Health (ENWHP) (1997) Luxemburger Deklaration zur Betrieblichen Gesundheitsförderung. <https://www.netzwerk-bgf.at/cdscontent/load?contentid=10008.571220&version=1391192956>. Accessed 07 Sep 2023
