# Supplementary material for: Multiplikatorenkonzepte zu Stress- und Emotionsregulation im Rettungsdienst – ein Scoping-Review
Source: Springer Nature journal article supplement (doi:10.1007/s10049-024-01318-1), 2024-03-22
Supplement: MOESM2 [file 26895664]

**Zusatzmaterial zum Beitrag** „Multiplikatorenkonzepte zu Stress- und Emotionsregulation im Rettungsdienst – ein Scoping Review“ von Hummel M., Steudtner M., Gebauer E. und Buruck G. (2024) in *Notfall+Rettungsmedizin*.

Beitrag und Zusatzmaterial stehen Ihnen auf [www.springermedizin.de](http://www.springermedizin.de) zur Verfügung. Bitte geben Sie dort den Beitragstitel in die Suche ein.

## Systematische Literaturrecherche in Fachdatenbanken: Rechercheprotokoll

Eine Beilage zu RefHunter (Manual zur Literaturrecherche in Fachdatenbanken)

Am Beispiel der Suchoberfläche PubMed

### Inhaltsverzeichnis

|                                                          |    |
|----------------------------------------------------------|----|
| Forschungsfrage(n).....                                  | 2  |
| Einschlusskriterien .....                                | 2  |
| 1 Festlegung des Rechercheprinzips .....                 | 2  |
| 2 Festlegung der Suchkomponenten.....                    | 2  |
| 3 Festlegung der zu durchsuchenden Fachdatenbanken ..... | 3  |
| 4 Identifikation von synonymen Suchbegriffen .....       | 3  |
| 5 Identifikation von Schlagwörtern .....                 | 5  |
| 6 Entwicklung des Suchstrings.....                       | 6  |
| 7 Überprüfung des Suchstrings.....                       | 7  |
| 8 Durchführung der Recherche .....                       | 11 |
| 9. Dokumentation der Recherche.....                      | 11 |

### Vorschlag zum Einsatz des Rechercheprotokolls:

Das Rechercheprotokoll ist eine Beilage zu RefHunter und orientiert sich an der im Manual vorgeschlagenen Vorgehensweise bei der Literaturrecherche in Fachdatenbanken. Das Rechercheprotokoll steht zur kostenlosen Nutzung zur Verfügung ([www.RefHunter.eu](http://www.RefHunter.eu)). Blau-formatierte Inhalte in diesem Rechercheprotokoll sind entsprechend der Recherche zu ersetzen.

### Zitiervorschlag:

Hirt, J. & Nordhausen, T. (2020). Systematische Literaturrecherche in Fachdatenbanken: Rechercheprotokoll. Eine Beilage zu RefHunter (Manual zur Literaturrecherche in Fachdatenbanken). Version 3.0 (Martin-Luther-Universität Halle-Wittenberg & FHS St.Gallen, Hrsg.), Halle (Saale) & St.Gallen. Verfügbar unter <https://refhunter.eu/rechercheprotokoll/>

Version 3.0  
15. Oktober 2020

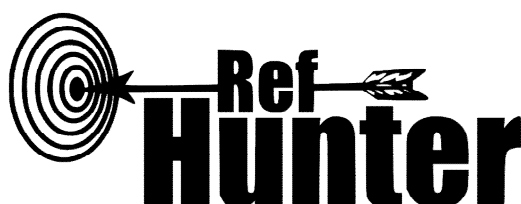

## Forschungsfrage(n)

Notieren Sie hier die Forschungsfrage(n).

Hauptfragestellung Welche Interventionen zur Stress- und/oder Emotionsregulation finden als Multiplikatorenkonzept im Rettungsdienst Anwendung für die Gesundheitsförderung?

Daraus ergeben sich spezifische Teilfragestellungen:

- Welche psychosozialen Widerstandsressourcen zum Umgang mit Stress und Emotionen können durch die Interventionen verändert werden?
- Wie müssen Intervention zur Stress- und Emotionsregulation aufgebaut sein, um erfolgreich zu sein?
- Existieren Interventionen zur Stress- und Emotionsregulation, welche ausschließlich im Rettungsdienst zum Einsatz kommen?

## Einschlusskriterien

Notieren Sie hier Ihre Einschlusskriterien. Sofern eine Begründung für (einzelne) Einschlusskriterien notwendig erscheint, sollten Sie diese unter der Tabelle festhalten.

| Domäne                            | Einschlusskriterien                                                                                                                                                                                                                                                                                                                                                                                                                                                                                            |
|-----------------------------------|----------------------------------------------------------------------------------------------------------------------------------------------------------------------------------------------------------------------------------------------------------------------------------------------------------------------------------------------------------------------------------------------------------------------------------------------------------------------------------------------------------------|
| Domäne 1 (Studententyp)           | Folgende deutsch- und englischsprachigen Studententypen werden eingeschlossen:<br><ul style="list-style-type: none"> <li>- Studien, welche die Gewinnung von Multiplikatorenpersonen beinhalten,</li> <li>- Studien, welche die Schulung von Multiplikatorenpersonen beinhalten,</li> <li>- Studien, welche die systematische Fortbildung einschließen,</li> <li>- Studien, welche Adaption und Evaluierung von Multiplikatorenkonzeptenpersonen beinhalten.</li> </ul> Keine Einschränkung der Evidenzquellen |
| Domäne 2 (Studienpopulation)      | betriebsgrößen- und trägerübergreifend alle erwerbstätigen Beschäftigten des Rettungsdienstes im Alter von 18-67 Jahren eingeschlossen. Ausgeschlossen sind Studien, die sich explizit an Studierende und Freiwillige richten.                                                                                                                                                                                                                                                                                 |
| Domäne 3 (bspw. Intervention(en)) | Train-the-Trainer / Multiplikatorenkonzepte                                                                                                                                                                                                                                                                                                                                                                                                                                                                    |
| Domäne 4 (bspw. Outcome(s))       | Stress-/Emotionsregulation, psychische Gesundheit sowie Wohlbefinden                                                                                                                                                                                                                                                                                                                                                                                                                                           |
| Domäne 4 (Setting(s))             | Rettungsdienst                                                                                                                                                                                                                                                                                                                                                                                                                                                                                                 |
| Weitere Domänen                   | Kriterium                                                                                                                                                                                                                                                                                                                                                                                                                                                                                                      |

Begründung für (einzelne) Ein- und Ausschlusskriterien:

- ☐ Begründung anführen.
- ☒ Keine Begründung notwendig.

## 1 Festlegung des Rechercheprinzips

- ☒ Sensitives Rechercheprinzip  
Ziel: Umfassende Recherche bzw. möglichst alle relevanten Treffer identifizieren.  
Begründung oder Ziel der Recherche anführen.
- ☐ Spezifisches Rechercheprinzip  
Ziel: Möglichst rasch die wichtigsten Treffer finden.  
Begründung oder Ziel der Recherche anführen.

## 2 Festlegung der Suchkomponenten

Definieren Sie hier die Suchkomponenten aus der Forschungsfrage. Sofern eine Begründung für (einzelne) festgelegte oder nicht festgelegte Suchkomponenten notwendig erscheint, sollten Sie diese unter der Tabelle festhalten.

| Suchkomponente   | Bezeichnung                                       |
|------------------|---------------------------------------------------|
| Suchkomponente 1 | Arbeitskontext                                    |
| Suchkomponente 2 | Gesundheitsförderung/Prävention im Arbeitskontext |
| Suchkomponente 3 | Multiplikatorenkonzepte                           |
| Suchkomponente 4 | Stress-, Emotionsregulation                       |
| Suchkomponente 5 | Rettungsdienst                                    |

Begründung für (einzelne) festgelegte oder nicht festgelegte Suchkomponenten:

- ☐ Begründung anführen.
- ☒ Keine Begründung notwendig.

### 3 Festlegung der zu durchsuchenden Fachdatenbanken

Definieren Sie hier die zu durchsuchenden Fachdatenbanken und ggf. die Suchmaschinen, mit der Sie die Fachdatenbanken durchsuchen. Halten Sie Ihre Entscheidung mit einer Begründung für die Auswahl der jeweiligen Fachdatenbank fest.

| Fachdatenbank           | Bezeichnung                                                                                                                                                         |
|-------------------------|---------------------------------------------------------------------------------------------------------------------------------------------------------------------|
|                         | Begründung                                                                                                                                                          |
| Fachdatenbank 1         | MEDLINE, PubMed Central via PubMed<br>Begründung: thematischer Bezug sowie abgedecktes Spektrum                                                                     |
| Fachdatenbank 2         | PSYINDEX, PASCAL, ISOC-Psicología, MEDLINE, ERIC, NARCIS, NORART, PsychOpen und PsychData via PubPsych<br>Begründung: thematischer Bezug sowie abgedecktes Spektrum |
| Weitere Fachdatenbanken |                                                                                                                                                                     |

### 4 Identifikation von synonymen Suchbegriffen

Definieren Sie hier die Suchbegriffe als Stichwörter und deren Synonyme je Suchkomponente. Sofern eine Begründung für (einzelne) gewählte oder nicht gewählte Suchbegriffe notwendig erscheint, sollten Sie diese unter der Tabelle festhalten.

| Suchkomponenten                                                           | Suchbegriffe                                                                                                                                                                                                                                                                                                                                                       |
|---------------------------------------------------------------------------|--------------------------------------------------------------------------------------------------------------------------------------------------------------------------------------------------------------------------------------------------------------------------------------------------------------------------------------------------------------------|
| Suchkomponente 1:<br>Arbeitskontext                                       | EMPLOYEE*<br>EMPLOYER*<br>EMPLOYMENT<br>WORKER*<br>JOB<br>PERSONNEL STAFF<br>COLLEAGUE*<br>OCCUPATION*<br>WORKPLACE*<br>"WORK PLACE**"<br>WORKSITE*<br>WORK SITE**<br>"WORK LOCATION**"<br>"WORK SETTING**"<br>ORGANIZATION<br>CORPORATE<br>COMPANY<br>COMPANIES<br>BUSINES*<br>WORKE*<br>WORK-RELATED<br>WORK ENVIRONMENT<br>WORKING ENVIRONMENT<br>OCCUPATIONAL* |
| Suchkomponente 2:<br>Gesundheitsförderung/Prävention im<br>Arbeitskontext | HEALTH PROMOTION<br>WORKPLACE HEALTH PROMOTION<br>WORKSITE HEALTH PROMOTION<br>HEALTH PROMOTION<br>HEALTH PREVENTION<br>ORGANISATIONAL HEALTH<br>HEALTH INTERVENTIONS<br>OCCUPATIONAL HEALTH                                                                                                                                                                       |

| Suchkomponenten                                          | Suchbegriffe                                                                                                                                                                                                                                                                                                                                                                                                                                                                                                                                              |
|----------------------------------------------------------|-----------------------------------------------------------------------------------------------------------------------------------------------------------------------------------------------------------------------------------------------------------------------------------------------------------------------------------------------------------------------------------------------------------------------------------------------------------------------------------------------------------------------------------------------------------|
|                                                          | OCCUPATIONAL HEALTH PROMTION<br>OCCUPATIONAL HEALTH PREVENTION<br>BEHAVIOURAL HEALTH PROMOTION<br>HEALTH BEHAVIOR<br>CHOICE BEHAVIOR<br>WORKPLACE WELLNESS                                                                                                                                                                                                                                                                                                                                                                                                |
| <b>Suchkomponente 3:<br/>Multiplikatorenkonzepte</b>     | PEER* SUPPORT*<br>MENTOR*<br>FACILITAT*<br>PEER ECUCATION<br>"PEER EDUCATION"<br>PEER ASSISTED TRAINING<br>"PEER ASSISTED PROGRAMS"<br>"PEER LED EDUCATION"<br>"PEER-LED EDUCATION"<br>"TRAIN THE TRAINER"<br>TRAIN THE TRAINER<br>COACH*<br>„COACH THE COACH“<br>„TUTOR THE TUTOR“<br>TUTOR<br>COLLEAGUE<br>COWORKER<br>INSTRUCTOR<br>FACILITAT* EDUCATION<br>MULTIPLIER<br>MULTIPLICATOR<br>MULTIPLYING FACTOR<br>DISSEMINATION<br>"KNOWLEDGE TRANSFER"                                                                                                 |
| <b>Suchkomponente 4:<br/>Stress-, Emotionsregulation</b> | STRESS* REGULATION<br>STRESS REGULATOR<br>STRESS REGULAT*<br>"SELF-REGULATION"<br>"SELF REGULATION"<br>EMOTION*<br>EMOTIONAL COMPETENC*<br>EMOTION REGULATION<br>AFFECT REGULATION<br>REGULATION STRATEGY<br>MENTAL HEALTH<br>MINDFULNESS<br>COPING                                                                                                                                                                                                                                                                                                       |
| <b>Suchkomponente 5:<br/>Rettungsdienst</b>              | "EMERGENCY AMBULANCE PARAMEDIC**"<br>"EMERGENCY PARAMEDIC**"<br>PARAMEDIC*<br>RESCUE WORKER*<br>RESCUE ASSISTANT*<br>RESCUER<br>FIRST-AID WORKER*<br>EMERGENCY MEDICAL TECHNICIAN<br>EMT<br>EMERGENCY ATTENDANT*<br>RESCUE PERSONNEL<br>EMERGENCY STAFF<br>EMERGENCY SERVICE STAFF<br>AMBULANCE STAFF<br>AMBULANCE CREW*<br>LIFE SAVING TEAM*<br>RESCUE SERVICE*<br>EMS<br>EMERGENCY MEDICAL SERVICE*<br>EMERGENCY MEDICAL CARE<br>PUBLIC EMERGENCY SERVICE*<br>EMERGENCY DEPARTMENT*<br>EMERGENCY SERVICE* SECTOR*<br>RESCUE AGENCY<br>RESCUE OPERATION* |

Begründung für (einzelne) gewählte oder nicht gewählte Suchbegriffe:

- ☐ Begründung anführen.
- ☒ Keine Begründung notwendig.

## 5 Identifikation von Schlagwörtern

Definieren Sie hier die Schlagwörter für die im vorherigen Schritt festgelegten Suchbegriffe je Suchkomponente und Fachdatenbank. Sofern eine Begründung für (einzelne) gewählte oder nicht gewählte Schlagwörter notwendig erscheint, sollten Sie diese unter der Tabelle festhalten.

| Suchbegriffe                                                                                                                                                                                                                                                                                                                                                                                                                                              | Suchkomponenten                                                                      | Schlagwörter:<br>Medline via PubMed                        |
|-----------------------------------------------------------------------------------------------------------------------------------------------------------------------------------------------------------------------------------------------------------------------------------------------------------------------------------------------------------------------------------------------------------------------------------------------------------|--------------------------------------------------------------------------------------|------------------------------------------------------------|
| EMPLOYEE*<br>EMPLOYER*<br>EMPLOYMENT<br>WORKER*<br>JOB<br>PERSONNEL STAFF<br>COLLEAGUE*<br>OCCUPATION*<br>WORKPLACE*<br>"WORK PLACE**"<br>WORKSITE*<br>WORK SITE**<br>"WORK LOCATION**"<br>"WORK SETTING**"<br>ORGANIZATION<br>CORPORATE<br>COMPANY<br>COMPANIES<br>BUSINES*<br>WORKE*<br>WORK-RELATED<br>WORK ENVIRONMENT<br>WORKING ENVIRONMENT<br>OCCUPATIONAL*                                                                                        | <b>Suchkomponente 1:</b><br><b>Arbeitskontext</b>                                    | OCCUPATIONS<br>OCCUPATIONAL GROUPS<br>WORKPLACE<br>WORK    |
| HEALTH PROMOTION<br>WORKPLACE HEALTH PROMOTION<br>WORKSITE HEALTH PROMOTION<br>HEALTH PROMOTION<br>HEALTH PREVENTION<br>ORGANISATIONAL HEALTH<br>HEALTH INTERVENTIONS<br>OCCUPATIONAL HEALTH<br>OCCUPATIONAL HEALTH PROMTION<br>OCCUPATIONAL HEALTH<br>PREVENTION<br>BEHAVIOURAL HEALTH PROMOTION<br>HEALTH BEHAVIOR<br>CHOICE BEHAVIOR<br>WORKPLACE WELLNESS                                                                                             | <b>Suchkomponente 2:</b><br><b>Gesundheitsförderung/Prävention im Arbeitskontext</b> | HEALTH PROMOTION<br>OCCUPATIONAL HEALTH<br>HEALTH BEHAVIOR |
| PEER* SUPPORT*<br>MENTOR*<br>FACILITAT*<br>PEER ECUCATION<br>"PEER EDUCATION"<br>PEER ASSISTED TRAINING<br>"PEER ASSISTED PROGRAMS"<br>"PEER LED EDUCATION"<br>"PEER-LED EDUCATION"<br>"TRAIN THE TRAINER"<br>TRAIN THE TRAINER<br>COACH*<br>„COACH THE COACH“<br>„TUTOR THE TUTOR“<br>TUTOR<br>COLLEAGUE<br>COWORKER<br>INSTRUCTOR<br>FACILITAT* EDUCATION<br>MULTIPLIER<br>MULTIPLICATOR<br>MULTIPLYING FACTOR<br>DISSEMINATION<br>"KNOWLEDGE TRANSFER" | <b>Suchkomponente 3:</b><br><b>Multiplikatorenkonzepte</b>                           | INSERVICE TRAINING<br>TEACHER TRAINING<br>EDUCATION        |
| STRESS* REGULATION                                                                                                                                                                                                                                                                                                                                                                                                                                        | <b>Suchkomponente 4:</b>                                                             | STRESS, PSYCHOLOGICAL                                      |

| Suchbegriffe                                                                                                                                                                                                                                                                                                                                                                                                                                                                                                                                                | Suchkomponenten                     | Schlagwörter:<br>Medline via PubMed                                                    |
|-------------------------------------------------------------------------------------------------------------------------------------------------------------------------------------------------------------------------------------------------------------------------------------------------------------------------------------------------------------------------------------------------------------------------------------------------------------------------------------------------------------------------------------------------------------|-------------------------------------|----------------------------------------------------------------------------------------|
| STRESS REGULATOR<br>STRESS REGULAT*<br>"SELF-REGULATION"<br>"SELF REGULATION"<br>EMOTION*<br>EMOTIONAL COMPETENC*<br>EMOTION REGULATION<br>AFFECT REGULATION<br>REGULATION STRATEGY<br>MENTAL HEALTH<br>MINDFULNESS<br>COPING                                                                                                                                                                                                                                                                                                                               | Stress-, Emotionsregulation         | OCCUPATIONAL STRESS<br>PSYCHOLOGICAL DISTRESS<br>EMOTIONAL REGULATION                  |
| "EMERGENCY AMBULANCE<br>PARAMEDIC**<br>"EMERGENCY PARAMEDIC**"<br>PARAMEDIC*<br>RESCUE WORKER*<br>RESCUE ASSISTANT*<br>RESCUER<br>FIRST-AID WORKER*<br>EMERGENCY MEDICAL TECHNICIAN<br>EMT<br>EMERGENCY ATTENDANT*<br>RESCUE PERSONNEL<br>EMERGENCY STAFF<br>EMERGENCY SERVICE STAFF<br>AMBULANCE STAFF<br>AMBULANCE CREW*<br>LIFE SAVING TEAM*<br>RESCUE SERVICE*<br>EMS<br>EMERGENCY MEDICAL SERVICE*<br>EMERGENCY MEDICAL CARE<br>PUBLIC EMERGENCY SERVICE*<br>EMERGENCY DEPARTMENT*<br>EMERGENCY SERVICE* SECTOR*<br>RESCUE AGENCY<br>RESCUE OPERATION* | Suchkomponente 5:<br>Rettungsdienst | EMERGENCY MEDICAL TECHNICIANS<br>ALLIED HEALTH PERSONNEL<br>EMERGENCIES<br>RESCUE WORK |

Begründung für (einzelne) gewählte oder nicht gewählte Schlagwörter:

- ☐ Begründung anführen.
- ☒ Keine Begründung notwendig.

## 6 Entwicklung des Suchstrings

Kombinieren Sie hier die in den vorherigen beiden Schritten identifizierten Stich- und Schlagwörter je Suchkomponente und Fachdatenbank spaltenweise zu einem Suchstring. Definieren Sie hier die Suchtechniken, bspw. Wildcards (bspw. Trunkierungen), Phrasensuche (bspw. Anführungszeichen) und Suchbefehle bzw. Suchfelder, in die der Suchstring eingefügt wird (Syntax). Sofern eine Begründung für (einzelnen) verwendeten oder nicht verwendeten Suchtechniken und/oder Suchbefehlen bzw. Suchfeldern notwendig erscheint, sollten Sie diese unter der Tabelle festhalten.

| Suchkomponente                                                         | Suchstring:<br>Medline via PubMed                                                                                                                                                                                                                                                                                                                                                                                                                                        |
|------------------------------------------------------------------------|--------------------------------------------------------------------------------------------------------------------------------------------------------------------------------------------------------------------------------------------------------------------------------------------------------------------------------------------------------------------------------------------------------------------------------------------------------------------------|
| Suchkomponente 1:<br>Arbeitskontext                                    | EMPLOYEE* OR EMPLOYER* OR EMPLOYMENT OR WORKER* OR JOB OR PERSONNEL<br>STAFF OR COLLEAGUE* OR OCCUPATION* OR OCCUPATIONS [MH] OR<br>OCCUPATIONAL GROUPS [MH] OR WORKPLACE* OR "WORK PLACE*" OR WORKSITE*<br>OR "WORK SITE*" OR "WORK LOCATION*" OR "WORK SETTING*" OR ORGANIZATION<br>OR CORPORATE OR COMPANY OR COMPANIES OR BUSINES* OR WORKPLACE [MH]<br>OR WORKE* OR WORK-RELATED OR WORK ENVIRONMENT OR WORKING<br>ENVIRONMENT OR OCCUPATIONAL* OR WORK [MH]<br>AND |
| Suchkomponente 2:<br>Gesundheitsförderung/Prävention im Arbeitskontext | HEALTH PROMOTION OR WORKPLACE HEALTH PROMOTION OR WORKSITE HEALTH<br>PROMOTION OR HEALTH PROMOTION OR HEALTH PREVENTION OR<br>ORGANISATIONAL HEALTH OR HEALTH INTERVENTIONS OR OCCUPATIONAL HEALTH<br>OR OCCUPATIONAL HEALTH PROMTION OR OCCUPATIONAL HEALTH PREVENTION                                                                                                                                                                                                  |

| Suchkomponente                                   | Suchstring:<br>Medline via PubMed                                                                                                                                                                                                                                                                                                                                                                                                                                                                                                                                                                                                                                     |
|--------------------------------------------------|-----------------------------------------------------------------------------------------------------------------------------------------------------------------------------------------------------------------------------------------------------------------------------------------------------------------------------------------------------------------------------------------------------------------------------------------------------------------------------------------------------------------------------------------------------------------------------------------------------------------------------------------------------------------------|
|                                                  | OR BEHAVIOURAL HEALTH PROMOTION OR HEALTH BEHAVIOR OR CHOICE BEHAVIOR OR WORKPLACE WELLNESS OR HEALTH PROMOTION [MH] OR OCCUPATIONAL HEALTH [MH] OR HEALTH BEHAVIOR [MH]                                                                                                                                                                                                                                                                                                                                                                                                                                                                                              |
|                                                  | AND                                                                                                                                                                                                                                                                                                                                                                                                                                                                                                                                                                                                                                                                   |
| Suchkomponente 3:<br>Multiplikatorenkonzeppte    | PEER* SUPPORT* OR MENTOR* OR FACILITAT* OR PEER ECUCATION OR "PEER EDUCATION" OR PEER ASSISTED TRAINING OR "PEER ASSISTED PROGRAMS" OR "PEER LED EDUCATION" OR "PEER-LED EDUCATION" OR "TRAIN THE TRAINER" OR TRAIN THE TRAINER OR COACH* OR „COACH THE COACH" OR „TUTOR THE TUTOR" OR TUTOR OR COLLEAGUE OR COWORKER OR INSTRUCTOR OR FACILITAT* EDUCATION OR INSERVICE TRAINING [MH] OR TEACHER TRAINING [MH] OR EDUCATION [MH] OR MULTIPLIER OR MULTIPLICATOR OR MULTIPLYING FACTOR OR DISSEMINATION OR "KNOWLEDGE TRANSFER"                                                                                                                                       |
|                                                  | AND                                                                                                                                                                                                                                                                                                                                                                                                                                                                                                                                                                                                                                                                   |
| Suchkomponente 4:<br>Stress-, Emotionsregulation | STRESS* REGULATION OR STRESS REGULATOR OR STRESS REGULAT* OR STRESS, PSYCHOLOGICAL [MH] OR OCCUPATIONAL STRESS [MH] OR PSYCHOLOGICAL DISTRESS [MH] OR "SELF-REGULATION" OR "SELF REGULATION" OR EMOTION* OR EMOTIONAL COMPETENC* OR EMOTION REGULATION OR AFFECT REGULATION OR REGULATION STRATEGY OR EMOTIONAL REGULATION [MH] OR MENTAL HEALTH OR MINDFULNESS OR COPING                                                                                                                                                                                                                                                                                             |
|                                                  | AND                                                                                                                                                                                                                                                                                                                                                                                                                                                                                                                                                                                                                                                                   |
| Suchkomponente 5:<br>Rettungsdienst              | "EMERGENCY AMBULANCE PARAMEDIC*" OR "EMERGENCY PARAMEDIC*" OR PARAMEDIC* OR RESCUE WORKER* OR RESCUE ASSISTANT* OR RESCUER OR FIRST-AID WORKER* OR EMERGENCY MEDICAL TECHNICIAN OR EMT OR EMERGENCY ATTENDANT* OR EMERGENCY MEDICAL TECHNICIANS [MH] OR ALLIED HEALTH PERSONNEL [MH] OR EMERGENCIES [MH] OR RESCUE PERSONNEL OR EMERGENCY STAFF OR EMERGENCY SERVICE STAFF OR AMBULANCE STAFF OR AMBULANCE CREW* OR LIFE SAVING TEAM* OR RESCUE SERVICE* OR EMS OR EMERGENCY MEDICAL SERVICE* OR EMERGENCY MEDICAL CARE OR PUBLIC EMERGENCY SERVICE* OR EMERGENCY DEPARTMENT* OR EMERGENCY SERVICE* SECTOR* OR RESCUE AGENCY OR RESCUE WORK [MH] OR RESCUE OPERATION* |

Begründung für (einzelne) verwendete oder nicht verwendete Suchtechniken und/oder Suchbefehle bzw. Suchfelder:

- ☐ Begründung anführen.
- ☒ Keine Begründung notwendig.7 Überprüfung des Suchstrings

Überprüfen Sie den Suchstring bzw. die Suchstrings anhand der folgenden Kontrollfragen oder lassen diesen bzw. diese nach Möglichkeit von einer anderen Person überprüfen (PRESS 2015 Guideline Evidence-Based Checklist)<sup>1</sup>.

- ☒ Suchstring überprüft
- Name: Mirco Steudtner, Gabriele Buruck, Michel Hummel
- ☐ Suchstring nicht überprüft

### Übersetzung der Forschungsfrage(n)

Passt die Suchstrategie zu meiner Forschungsfrage?

- ☒ Ja
- ☐ Nein

Sind die Suchkomponenten klar definiert und voneinander abgegrenzt?

<sup>1</sup> Übersetzung orientiert sich an: McGowan, J., Sampson, M., Salzwedel, D. M., Cogo, E., Foerster, V. & Lefebvre, C. (2016). PRESS Peer Review of Electronic Search Strategies: 2015 Guideline Statement. Journal of Clinical Epidemiology, 75, 40-46.

- ☒ Ja  
☐ Nein

Gibt es zu wenig oder zu viele Suchkomponenten?

- ☐ Ja, zu wenig / zu viele  
☒ Nein

Sind die Suchkomponenten zu spezifisch oder zu sensitiv?

- ☐ Ja, zu spezifisch / zu sensitiv  
☒ Nein

Gibt es zu wenig oder zu viele Suchtreffer?

- ☐ Ja, zu wenig / zu viele  
☒ Nein

### Operatoren

Sind die Operatoren richtig eingesetzt?

- ☒ Ja  
☐ Nein  
☐ Nicht anwendbar

Sind die Klammern im Suchstring richtig platziert?

- ☒ Ja  
☐ Nein  
☐ Nicht anwendbar

Ist es wahrscheinlich, dass Operator NOT zum Ausschluss von potentiell relevanten Publikationen führt?

- ☐ Ja  
☐ Nein  
☒ Nicht angewendet

Könnte die Verwendung von Wortabstandsoperatoren zu einem präziseren Suchergebnis führen?

- ☐ Ja  
☒ Nein  
☐ Nicht anwendbar

Wurden Wortabstandsoperatoren mit einer angemessenen Wortabstandszahl eingesetzt?

- ☐ Ja  
☐ Nein  
☐ Nicht anwendbar

### Schlagwörter

Sind alle Schlagwörter relevant?

- ☒ Ja  
☐ Nein  
☐ Nicht anwendbar

Fehlen relevante Schlagwörter?

- ☐ Ja
- ☒ Nein
- ☐ Nicht anwendbar

Sind unter- oder übergeordnete Schlagwörter zu breit oder zu nah?

- ☐ Ja, zu breit / zu nah
- ☒ Nein
- ☐ Nicht anwendbar

Wurden die Schlagwörter richtig ausgeweitet auf darunterliegende Schlagwörter?

- ☒ Ja
- ☐ Nein
- ☐ Nicht anwendbar

Wurden die Subheadings richtig den Schlagwörtern zugeordnet?

- ☒ Ja
- ☐ Nein
- ☐ Nicht anwendbar

Wurden für jede Suchkomponente Stich- und Schlagwörter definiert?

- ☒ Ja
- ☐ Nein
- ☐ Nicht anwendbar

### Stichwörter

Enthalten die Stichwörter alle relevanten Wortkombinationen?

- ☒ Ja
- ☐ Nein
- ☐ Nicht anwendbar

Sind alle Synonyme definiert?

- ☒ Ja
- ☐ Nein
- ☐ Nicht anwendbar

Sind Platzhalter richtig eingesetzt?

- ☐ Ja
- ☐ Nein
- ☐ Nicht anwendbar

Ist die Trunkierung zu früh oder zu spät platziert?

- ☐ Ja
- ☒ Nein
- ☐ Nicht anwendbar

Sind Akronyme und Abkürzungen angemessen eingesetzt und sind auch die ausgeschriebenen Begriffe integriert?

- ☒ Ja
- ☐ Nein
- ☐ Nicht anwendbar

Sind die Stichwörter zu spezifisch oder zu sensitiv?

- ☐ Ja, zu spezifisch / zu sensitiv
- ☒ Nein
- ☐ Nicht anwendbar

Sind die Suchbefehle richtig eingesetzt?

- ☒ Ja
- ☐ Nein
- ☐ Nicht anwendbar

### Schreibweise, Syntax und Zeilenanzahl

Gibt es Rechtschreibfehler?

- ☐ Ja
- ☒ Nein

Gibt es Fehler bei der Syntax?

- ☐ Ja
- ☒ Nein

Wurden alle Suchkomponenten in den Suchstring integriert?

- ☒ Ja
- ☐ Nein

### Limitationen und Suchfilter

Wurden Limitierungen und/oder Suchfilter angemessen und richtig eingesetzt?

- ☒ Ja
- ☐ Nein
- ☐ Nicht anwendbar

Sind die Limitierungen und/oder Suchfilter in der jeweiligen Fachdatenbank indiziert?

- ☒ Ja
- ☐ Nein
- ☐ Nicht anwendbar

Fehlen Limitierungen und/oder Suchfilter?

- ☐ Ja
- ☒ Nein
- ☐ Nicht anwendbar

### Korrektur des Suchstrings bzw. weitere Konsequenzen für das Recherchevorhaben

Legen Sie hier die sich aus der Überprüfung ergebenden notwendigen oder empfohlenen Korrekturen bzw. weitere Konsequenzen für das Recherchevorhaben dar.

## 8 Durchführung der Recherche

Dokumentieren Sie hier bspw. Suchfilter und/oder Limitierungen (bspw. in Hinblick auf die Ein- und Ausschlusskriterien für die Studiaauswahl), die Sie bei der Recherche angewendet haben sowie Besonderheiten, die bei der Durchführung der Recherche in Fachdatenbanken auftraten. Sofern eine Begründung für die Verwendung von Suchfiltern und/oder Limitierungen notwendig erscheint, sollten Sie diese hier festhalten.

Suchfilter Sprache Deutsch und Englisch

## 9. Dokumentation der Recherche

am Beispiel der Suchoberfläche PubMed siehe ergänzendes Excel-Dokument

Jeweilige Besonderheiten/Begründungen der einzelnen Kapitel können dem Manuskript entnommen werden.
