# Supplementary material for: Multiplikatorenkonzepte zu Stress- und Emotionsregulation im Rettungsdienst – ein Scoping-Review
Source: Springer Nature journal article supplement (doi:10.1007/s10049-024-01318-1), 2024-03-22
Supplement: MOESM3 [file 26905242]

**Zusatzmaterial zum Beitrag** „Multiplikatorenkonzepte zu Stress- und Emotionsregulation im Rettungsdienst – ein Scoping Review“ von Hummel M., Steudtner M., Gebauer E. und Buruck G. (2024) in *Notfall+Rettungsmedizin*.

Beitrag und Zusatzmaterial stehen Ihnen auf [www.springermedizin.de](http://www.springermedizin.de) zur Verfügung. Bitte geben Sie dort den Beitragstitel in die Suche ein.

## Beispieltabelle für die Extraktion von Studiendaten/-ergebnissen

| <b>Scoping Review Details:</b>          |                                                                                                                                                                                                                                                                                                                                                                                                                                                                                                                                                                                                                                                         |
|-----------------------------------------|---------------------------------------------------------------------------------------------------------------------------------------------------------------------------------------------------------------------------------------------------------------------------------------------------------------------------------------------------------------------------------------------------------------------------------------------------------------------------------------------------------------------------------------------------------------------------------------------------------------------------------------------------------|
| <b>Titel:</b>                           | Multiplikatorenkonzepte zu Stress- und Emotionsregulation im Rettungsdienst – ein Scoping Review<br>Train-the-trainer concepts for stress and emotion regulation in emergency medical services – a scoping review                                                                                                                                                                                                                                                                                                                                                                                                                                       |
| <b>Review-Zielsetzung/en:</b>           | Die Überprüfung der verfügbaren Evidenz von Multiplikatorenkonzepten zur Stress- und Emotionsregulation im Rettungsdienst ist das Hauptziel des durchgeführten Scoping Reviews.                                                                                                                                                                                                                                                                                                                                                                                                                                                                         |
| <b>Review-Fragestellungen:</b>          | Welche Interventionen zur Stress- und/oder Emotionsregulation finden als Multiplikatorenkonzept im Rettungsdienst Anwendung für die Gesundheitsförderung? Daraus ergeben sich spezifische Teilfragestellungen: <ul style="list-style-type: none"> <li>• Welche psychosozialen Widerstandsressourcen zum Umgang mit Stress und Emotionen können durch die Interventionen verändert werden?</li> <li>• Wie müssen Intervention zur Stress- und Emotionsregulation aufgebaut sein, um erfolgreich zu sein?</li> <li>• Existieren Interventionen zur Stress- und Emotionsregulation, welche ausschließlich im Rettungsdienst zum Einsatz kommen?</li> </ul> |
| <b>Einschluss-/Ausschlusskriterien:</b> |                                                                                                                                                                                                                                                                                                                                                                                                                                                                                                                                                                                                                                                         |
| <b>Population:</b>                      | In dem Scoping Review werden betriebsgrößen- und trägerübergreifend alle erwerbstätig Beschäftigten des Rettungsdienstes im Alter von 18-67 Jahren eingeschlossen. Ausgeschlossen sind Studien, die sich explizit an Studierende und Freiwillige richten. Es gibt keine geografischen, geschlechterspezifischen, ethnischen oder weiteren Einschränkungen des Settings.                                                                                                                                                                                                                                                                                 |
| <b>Konzept:</b>                         | Die Konzepte, welche mit dem Scoping Review untersucht werden sollen, sind die Stress- und/oder Emotionsregulation.<br><br>Das Konstrukt der Multiplikatorenkonzepte orientiert sich an den vier Stufen der Kriterien für Gute Praxis zur soziallagenbezogenen Gesundheitsförderung                                                                                                                                                                                                                                                                                                                                                                     |
| <b>Kontext:</b>                         | Rettungsdienst                                                                                                                                                                                                                                                                                                                                                                                                                                                                                                                                                                                                                                          |
| <b>Studientypen:</b>                    | Folgende deutsch- und englischsprachigen Studientypen werden eingeschlossen: <ul style="list-style-type: none"> <li>• Studien, welche die Gewinnung von Multiplikatorenpersonen beinhalten</li> <li>• Studien, welche die Schulung von Multiplikatorenpersonen beinhalten</li> <li>• Studien, welche die systematische Fortbildung einschließen</li> <li>• Studien, welche Adaption und Evaluierung von Multiplikatorenkonzepten beinhalten</li> </ul>                                                                                                                                                                                                  |

| <b>Scoping Review Details:</b>                                                                              |                                                                                                                                                                                                                                                                                                 |
|-------------------------------------------------------------------------------------------------------------|-------------------------------------------------------------------------------------------------------------------------------------------------------------------------------------------------------------------------------------------------------------------------------------------------|
| <b>Studiendetails und -eigenschaften:</b>                                                                   | In dem geplanten Scoping Review wird keine Einschränkung hinsichtlich der Evidenzquelle oder deren Qualität vorgenommen, um alle Arten von Quellen und Studientypen zu berücksichtigen und damit einen möglichst großen Überblick über die Forschungslandschaft und die Datenbasis zu erhalten. |
| <b>Referenz (z.B. Autor, Titel, Journal, Jahrgang, Nummer, Seitenzahl):</b>                                 |                                                                                                                                                                                                                                                                                                 |
| <b>Land:</b>                                                                                                |                                                                                                                                                                                                                                                                                                 |
| <b>Theoretische Grundlage:</b>                                                                              |                                                                                                                                                                                                                                                                                                 |
| <b>Evidenz (Studientyp):</b>                                                                                |                                                                                                                                                                                                                                                                                                 |
| <b>Kontext:</b>                                                                                             |                                                                                                                                                                                                                                                                                                 |
| <b>Studienziel</b>                                                                                          |                                                                                                                                                                                                                                                                                                 |
| <b>Teilnehmer (z. B. Altersverteilung):</b>                                                                 |                                                                                                                                                                                                                                                                                                 |
| <b>Rekrutierung/Ansprache von Multiplikatoren</b>                                                           |                                                                                                                                                                                                                                                                                                 |
| <b>Schulungsmaßnahmen für die Multiplikatoren</b>                                                           |                                                                                                                                                                                                                                                                                                 |
| <b>Systematische Fortbildung von Multiplikatoren</b>                                                        |                                                                                                                                                                                                                                                                                                 |
| <b>Betreuung der Multiplikatoren</b>                                                                        |                                                                                                                                                                                                                                                                                                 |
| <b>Evaluation und Anpassung der Maßnahmen</b>                                                               |                                                                                                                                                                                                                                                                                                 |
| <b>Ansprache von Zielgruppen</b>                                                                            |                                                                                                                                                                                                                                                                                                 |
| <b>konkreten Maßnahmen im Hinblick auf Emotionsregulation sowie psychische Gesundheit und Wohlbefinden:</b> |                                                                                                                                                                                                                                                                                                 |
| <b>Für das Konzept relevante Daten (Interventionsbeschreibung):</b>                                         |                                                                                                                                                                                                                                                                                                 |
| <b>Bsp. 1: Konstrukt der Emotionsregulation:</b>                                                            |                                                                                                                                                                                                                                                                                                 |
| <b>Bsp. 2: Zahl der Items im Instrument:</b>                                                                |                                                                                                                                                                                                                                                                                                 |
| <b>Bsp. 3: Details der psychometrischen Validierung des Instruments:</b>                                    |                                                                                                                                                                                                                                                                                                 |
| <b>Für das Konzept relevante Daten (Interventionsbeschreibung):</b>                                         |                                                                                                                                                                                                                                                                                                 |
| <b>Bsp. 1: Konstrukt der Psychische Gesundheit:</b>                                                         |                                                                                                                                                                                                                                                                                                 |
| <b>Bsp. 2: Zahl der Items im Instrument:</b>                                                                |                                                                                                                                                                                                                                                                                                 |
| <b>Bsp. 3: Details der psychometrischen Validierung des Instruments:</b>                                    |                                                                                                                                                                                                                                                                                                 |
| <b>Für das Konzept relevante Daten (Interventionsbeschreibung):</b>                                         |                                                                                                                                                                                                                                                                                                 |
| <b>Bsp. 1: Konstrukt von Wohlbefinden:</b>                                                                  |                                                                                                                                                                                                                                                                                                 |
| <b>Bsp. 2: Zahl der Items im Instrument:</b>                                                                |                                                                                                                                                                                                                                                                                                 |
| <b>Bsp. 3: Details der psychometrischen Validierung des Instruments:</b>                                    |                                                                                                                                                                                                                                                                                                 |
