# Supplementary material for: Multiplikatorenkonzepte zu Stress- und Emotionsregulation im Rettungsdienst – ein Scoping-Review
Source: Springer Nature journal article supplement (doi:10.1007/s10049-024-01318-1), 2024-03-22
Supplement: MOESM4 [file 26895664]

**Zusatzmaterial zum Beitrag** „Multiplikatorenkonzepte zu Stress- und Emotionsregulation im Rettungsdienst – ein Scoping Review“ von Hummel M., Steudtner M., Gebauer E. und Buruck G. (2024) in *Notfall+Rettenungsmedizin*.

Beitrag und Zusatzmaterial stehen Ihnen auf [www.springermedizin.de](http://www.springermedizin.de) zur Verfügung. Bitte geben Sie dort den Beitragstitel in die Suche ein.

## Zusammenfassung der Kerninhalte

| Autoren/Jahr/Titel                                                                                                                                                         | Studienort und -typ                                               | Population                                                                                                                                                                                                                               | Studienziel                                                                                                                                                                                                                                                                                                                                                                                                                                                                                                        | Beschreibung Intervention                                                                                                                                                                                                                                                                                                                                                                                                                                                                                                       | Erfüllung des Kriteriums Multiplikatorenkonzept                                                                                                                                                                                                                                                                                                                  | Psychosoziale Widerstandsressourcen              | Ergebnisse                                                                                                                                               |
|----------------------------------------------------------------------------------------------------------------------------------------------------------------------------|-------------------------------------------------------------------|------------------------------------------------------------------------------------------------------------------------------------------------------------------------------------------------------------------------------------------|--------------------------------------------------------------------------------------------------------------------------------------------------------------------------------------------------------------------------------------------------------------------------------------------------------------------------------------------------------------------------------------------------------------------------------------------------------------------------------------------------------------------|---------------------------------------------------------------------------------------------------------------------------------------------------------------------------------------------------------------------------------------------------------------------------------------------------------------------------------------------------------------------------------------------------------------------------------------------------------------------------------------------------------------------------------|------------------------------------------------------------------------------------------------------------------------------------------------------------------------------------------------------------------------------------------------------------------------------------------------------------------------------------------------------------------|--------------------------------------------------|----------------------------------------------------------------------------------------------------------------------------------------------------------|
| Tan et al. (2023); Web-Based Mind-Body Tactical Resilience Training Program for First Responders: Pre-Post Study Assessing Feasibility, Acceptability, and Usability [1]   | USA, Interventionsstudie ohne Kontrollgruppe                      | Ersthelfer im aktiven Dienst, insb. Feuerwehrleute, Polizisten, Sanitäter und Disponenten: n = 42<br>Strafverfolgungsbehörden 17 (40 %) Feuerwehrmann oder Rettungssanitäter 17 (40 %) Rettungssanitäter oder Notfallsanitäter 13 (31 %) | Das primäre Ziel dieser Studie war es, die Durchführbarkeit, Akzeptanz und Nutzbarkeit eines webbasierten taktischen Resilienz-Trainingsprogramms für Ersthelfer zu ermitteln, das kulturell informiert und berufsspezifisch ist. Darüber hinaus untersuchte die Studie in Bezug auf die Verringerung von PTBS-Symptomen und psychischer Belastung, die Veränderung von Einstellungen zu Stress, Emotionsregulation und wahrgenommener psychologischer Bereitschaft und die Verbesserung der Arbeitsproduktivität. | 6-wöchiges webbasierte Resilienz-Intervention, trainiert basiert auf Grundsätzen von Hartha-Yoga mit sechs Modulen, jeder Abschnitt musste nacheinander absolviert werden und enthielt eine Reihe von Kurzvorträgen und Technik-Videos (jeweils zwischen fünf und zehn Minuten) kurzen Artikeln und Quizfragen sowie angeleiteten Video- und Audioaufzeichnungen oder Audioaufnahmen von Yoga- und Achtsamkeitstechniken von fünf bis 30 Minuten. Jedes Modul dauerte etwa 1 bis 1,5 Stunden zu absolvieren. Hausaufgabenvideos | Stufe 1:<br>- Online (Schneeballprinzip) für Umfrage<br>- Einschlusskriterien<br><br>Stufe 2:<br>- Webbasiert<br>- Sechs Module mit individuellen Lehrformen<br><br>Stufe 3:<br>- Diskussion, Gruppenkurse<br>- Automatische Erinnerungen<br><br>Stufe 4:<br>- Statistikdaten., primäres und sekundäres Outcome<br>- Anpassungen notwendig, aber nicht berichtet | - Emotionsregulation<br>- Einstellung zum Stress | Verbesserung der Einstellung zu Stress mit einer mittleren Differenz, alle anderen Outcomes nicht signifikant                                            |
| Stelnicki et al. (2021); Evaluation of Before Operational Stress: A Program to Support Mental Health and Proactive Psychological Protection in Public Safety Personnel [2] | Kanada, Interventionsstudie, verblindet mit sechs Messzeitpunkten | Beschäftigte öffentlicher Sicherheit: Gesamt n = 136; überwiegend Feuerwehrleute 33,8 % (46); 15,8 % (3); Rettungssanitäter 18,4 % (25), 21,1 % (4) sowie Polizei                                                                        | Bewertung arbeitsbezogener Stress mit einem Programm (Before Operational Stress – BOS) zur Unterstützung der psychischen Gesundheit Individuelle und gruppenspezifische Veränderungen bei verschiedenen psychischen Gesundheitssymptomen, die häufig von PSP berichtet werden sowie Veränderungen bei der Emotionsregulation, von der Basislinie (Zeitpunkt 1) bis zehn Monate                                                                                                                                     | 16-stündiges Programm verteilt über ein Jahr, das in acht wöchentliche Module unterteilt ist und in einer Gruppe von bis zu zwölf Teilnehmenden durchgeführt wird (zehn Teilnehmende werden derzeit als optimal angesehen). Jede zweistündige Sitzung ist ausgewogen zwischen der Präsentation didaktischer Inhalte (Psychoedukation) und der Zeit für die                                                                                                                                                                      | Stufe 1:<br>- Rekrutierung per Mail<br>- Aufnahmegespräch<br><br>Stufe 2:<br>- Acht Module<br>- 10 Folgesitzungen<br><br>Stufe 3:<br>- Beaufsichtigung bei erster Sitzung<br>- Checkliste, Supervision, Wiederholung der Inhalte<br><br>Stufe 4:                                                                                                                 | - Emotionsregulation<br>- Soziale Unterstützung  | kleine, statistisch signifikante Verbesserungen der PTSD-Symptome, der Lebensqualität, der Stigmatisierung und der wahrgenommenen sozialen Unterstützung |

| Autoren/Jahr/Titel                                                                                                                                                                      | Studienort und -typ                  | Population                                                                                                                                                                                                                                                                                                                                                                                                                                       | Studienziel                                                                                                                                                                          | Beschreibung Intervention                                                                                                                                                                                                                                                                                                                                                                                                                                                            | Erfüllung des Kriteriums Multiplikatorenkonzept                                                                                                                                                                                                                                                                                                                                 | Psychosoziale Widerstandsressourcen                                                                                                                                                         | Ergebnisse                                                                                                                                                                                                     |
|-----------------------------------------------------------------------------------------------------------------------------------------------------------------------------------------|--------------------------------------|--------------------------------------------------------------------------------------------------------------------------------------------------------------------------------------------------------------------------------------------------------------------------------------------------------------------------------------------------------------------------------------------------------------------------------------------------|--------------------------------------------------------------------------------------------------------------------------------------------------------------------------------------|--------------------------------------------------------------------------------------------------------------------------------------------------------------------------------------------------------------------------------------------------------------------------------------------------------------------------------------------------------------------------------------------------------------------------------------------------------------------------------------|---------------------------------------------------------------------------------------------------------------------------------------------------------------------------------------------------------------------------------------------------------------------------------------------------------------------------------------------------------------------------------|---------------------------------------------------------------------------------------------------------------------------------------------------------------------------------------------|----------------------------------------------------------------------------------------------------------------------------------------------------------------------------------------------------------------|
|                                                                                                                                                                                         |                                      |                                                                                                                                                                                                                                                                                                                                                                                                                                                  | nach der Intervention (Zeitpunkt 6) bewertet werden                                                                                                                                  | Gruppenarbeit                                                                                                                                                                                                                                                                                                                                                                                                                                                                        | - Qualitativ, quantitativ<br>- Keine Anpassungen kommuniziert                                                                                                                                                                                                                                                                                                                   |                                                                                                                                                                                             |                                                                                                                                                                                                                |
| Wild et al. (2020); Evaluating the effectiveness of a group-based resilience intervention versus psychoeducation for emergency responders in England: A randomised controlled trial [3] | GB/England, Zweiarmlige RCT-Studie   | Polizei-, Krankenwagen-, Feuerwehr-, Such- und Rettungsdienstpersonal, insgesamt 430 Teilnehmende (Resilienzintervention n = 317; Psychoedukation n = 113)<br>Die Mehrheit der Teilnehmenden war weiblich (58,1 %), weiß-britisch (89,7 %), Durchschnitt 41 Jahre alt (SD = 9,78)                                                                                                                                                                | Prüfung der Wirksamkeit einer Resilienz-Intervention im Vergleich zu einer Online-Psychoedukation                                                                                    | Sechs Treffen mit einer Dauer von 2,5 Stunden, welche mit einem Fragebogen zur Nützlichkeit abgeschlossen wurden. Jede Gruppensitzung wurde aufgezeichnet. Die Rekrutierung erfolgt über unterschiedliche Kanäle (Vorträge, E-Mail, Poster, Broschüren) von Mai-November 2015 an neun ausgewählten Standorten über ein Jahr. Die Teilnehmenden konnten sich online anmelden und wurden vorher zu posttraumatischem Stress befragt und bei hohem Score aus der Studie ausgeschlossen. | Stufe 1:<br>- Vorträge, Mails, Poster etc. über lokale Zentren<br>- Registrierung über Webseite<br><br>Stufe 2:<br>- Eintätiger Workshop für Moderatoren<br>- Inhalte für sechs gruppenbasierte Sessions<br><br>Stufe 3:<br>- Hausaufgaben<br>- Wöchentliche Betreuung<br><br>Stufe 4:<br>- Primäres, sekundäres Outcome<br>- Nachuntersuchung<br>- Keine Anpassungen berichtet | - Wohlbefinden<br>- Resilienz<br>- Selbsteffektivität<br>- Soziale Unterstützung (zu Hause und am Arbeitsplatz)<br>- Sozialkapital – Soziale Teilhabe<br>- Coping<br>- Problemlösefähigkeit | Lineare Mixed-Effects-Modelle zeigten bei <b>keinem</b> Ergebnismaß einen signifikanten Unterschied zwischen den Interventionen, weder zum Zeitpunkt nach der Intervention noch zum Nachbeobachtungszeitpunkt. |
| Marks et al. (2017); REACT: A paraprofessional training program for first responders – A pilot study [4]                                                                                | USA, Pilotstudie ohne Kontrollgruppe | Sechs öffentliche Sicherheitsbehörden, insgesamt 30 Personen, waren anwesend und nahmen an REACT teil. Bei den öffentlichen Sicherheitsbehörden handelte es sich um vier Feuerwehren und zwei Notfallkommunikationszentren. Die Teilnehmenden waren 30-58 Jahre alt (M = 43,26; SD = 8,41) und überwiegend männlich (75,9 %). Die Mehrheit (76,9 %) der Teilnehmenden gehörte zu den Feuerwehren, der Rest (23,1 %) zu den Kommunikationszentren | Beschreibung und Evaluierung des neu konzipierten Peer-Unterstützungsprogramms REACT (Recognize, Evaluate, Advocate, Coordinate, and Track) zur Förderung der psychischen Gesundheit | Ganzer Tag mit vier Modulen, Klassenzimmerformat und Kleingruppensitzungen, Arbeitsbuch für Teilnehmende                                                                                                                                                                                                                                                                                                                                                                             | Stufe 1:<br>- Sechs Behörden<br>- Keine weiteren Aussagen<br><br>Stufe 2:<br>- Eine Sechsstündige Sitzung (vier Module)<br>- Örtliche Feuerwehr<br>- Klassenzimmerformat, Kleingruppen, Rollenspiele<br><br>Stufe 3:<br>- Arbeitsbuch<br>- „postevaluation packet“<br><br>Stufe 4:<br>- Primäres und sekundäres Outcome<br>- Unkonkret: Anpassungen                             | - Wissen anhand eines Wissenstests<br>- Selbstvertrauen<br>- Selbstwirksamkeit<br>- Resilienz                                                                                               | - Erhöhung der Selbstwirksamkeit<br>- Verbesserung Wissen                                                                                                                                                      |
